# Supplementary material for: Engineered CRISPR-Cas12a for higher-order combinatorial chromatin perturbations
Source: Springer Nature journal article supplement (doi:10.1038/s41587-024-02224-0), 2024-05-17
Supplement: 41587_2024_2224_MOESM2_ESM.pdf [file 41587_2024_2224_MOESM2_ESM.pdf]

## Reporting Summary

Nature Portfolio wishes to improve the reproducibility of the work that we publish. This form provides structure for consistency and transparency in reporting. For further information on Nature Portfolio policies, see our [Editorial Policies](#) and the [Editorial Policy Checklist](#).

### Statistics

For all statistical analyses, confirm that the following items are present in the figure legend, table legend, main text, or Methods section.

n/a | Confirmed

- |                                     |                                     |                                                                                                                                                                                                                                                            |
|-------------------------------------|-------------------------------------|------------------------------------------------------------------------------------------------------------------------------------------------------------------------------------------------------------------------------------------------------------|
| <input type="checkbox"/>            | <input checked="" type="checkbox"/> | The exact sample size ( $n$ ) for each experimental group/condition, given as a discrete number and unit of measurement                                                                                                                                    |
| <input type="checkbox"/>            | <input checked="" type="checkbox"/> | A statement on whether measurements were taken from distinct samples or whether the same sample was measured repeatedly                                                                                                                                    |
| <input type="checkbox"/>            | <input checked="" type="checkbox"/> | The statistical test(s) used AND whether they are one- or two-sided<br><i>Only common tests should be described solely by name; describe more complex techniques in the Methods section.</i>                                                               |
| <input checked="" type="checkbox"/> | <input type="checkbox"/>            | A description of all covariates tested                                                                                                                                                                                                                     |
| <input checked="" type="checkbox"/> | <input type="checkbox"/>            | A description of any assumptions or corrections, such as tests of normality and adjustment for multiple comparisons                                                                                                                                        |
| <input type="checkbox"/>            | <input checked="" type="checkbox"/> | A full description of the statistical parameters including central tendency (e.g. means) or other basic estimates (e.g. regression coefficient) AND variation (e.g. standard deviation) or associated estimates of uncertainty (e.g. confidence intervals) |
| <input type="checkbox"/>            | <input checked="" type="checkbox"/> | For null hypothesis testing, the test statistic (e.g. $F$ , $t$ , $r$ ) with confidence intervals, effect sizes, degrees of freedom and $P$ value noted<br><i>Give <math>P</math> values as exact values whenever suitable.</i>                            |
| <input checked="" type="checkbox"/> | <input type="checkbox"/>            | For Bayesian analysis, information on the choice of priors and Markov chain Monte Carlo settings                                                                                                                                                           |
| <input checked="" type="checkbox"/> | <input type="checkbox"/>            | For hierarchical and complex designs, identification of the appropriate level for tests and full reporting of outcomes                                                                                                                                     |
| <input type="checkbox"/>            | <input checked="" type="checkbox"/> | Estimates of effect sizes (e.g. Cohen's $d$ , Pearson's $r$ ), indicating how they were calculated                                                                                                                                                         |

*Our web collection on [statistics for biologists](#) contains articles on many of the points above.*

### Software and code

Policy information about [availability of computer code](#)

Data collection

Data analysis

For manuscripts utilizing custom algorithms or software that are central to the research but not yet described in published literature, software must be made available to editors and reviewers. We strongly encourage code deposition in a community repository (e.g. GitHub). See the Nature Portfolio [guidelines for submitting code & software](#) for further information.

### Data

Policy information about [availability of data](#)

All manuscripts must include a [data availability statement](#). This statement should provide the following information, where applicable:

- Accession codes, unique identifiers, or web links for publicly available datasets
- A description of any restrictions on data availability
- For clinical datasets or third party data, please ensure that the statement adheres to our [policy](#)

## Human research participants

Policy information about [studies involving human research participants and Sex and Gender in Research](#).

|                             |     |
|-----------------------------|-----|
| Reporting on sex and gender | N/A |
| Population characteristics  | N/A |
| Recruitment                 | N/A |
| Ethics oversight            | N/A |

Note that full information on the approval of the study protocol must also be provided in the manuscript.

## Field-specific reporting

Please select the one below that is the best fit for your research. If you are not sure, read the appropriate sections before making your selection.

Life sciences       Behavioural & social sciences       Ecological, evolutionary & environmental sciences

For a reference copy of the document with all sections, see [nature.com/documents/nr-reporting-summary-flat.pdf](https://nature.com/documents/nr-reporting-summary-flat.pdf)

## Life sciences study design

All studies must disclose on these points even when the disclosure is negative.

|                 |                                                                                                                                                                                                                                                                                                                                                                                                                                                                                                                                  |
|-----------------|----------------------------------------------------------------------------------------------------------------------------------------------------------------------------------------------------------------------------------------------------------------------------------------------------------------------------------------------------------------------------------------------------------------------------------------------------------------------------------------------------------------------------------|
| Sample size     | All screens were performed in duplicate per standards in the functional genomics field. Correlation between samples demonstrate adequate sample size.                                                                                                                                                                                                                                                                                                                                                                            |
| Data exclusions | Exclusions of constructs in screen analyses are described in Methods based on minimum RPM > 1. Both Library 1 and Library 2 were constructed from pooled oligonucleotide libraries designed to contain crRNA constructs designed for exploratory analysis for a separate unpublished study. Sequencing reads from those non-contributory constructs are present in the raw fastq files, do not affect interpretation of Library 1 and Library 2 screen cell fitness scores, and are excluded from analysis in the present study. |
| Replication     | Number of replicates are specified in figure captions.                                                                                                                                                                                                                                                                                                                                                                                                                                                                           |
| Randomization   | Populations of cells are randomly allocated into individual wells for treatments.                                                                                                                                                                                                                                                                                                                                                                                                                                                |
| Blinding        | Not used. This is not applicable to molecular biology and functional genomics experiments. The analyses entail interpretations of quantitative distributions and do not involve subjective judgment calls by the experimenter.                                                                                                                                                                                                                                                                                                   |

## Reporting for specific materials, systems and methods

We require information from authors about some types of materials, experimental systems and methods used in many studies. Here, indicate whether each material, system or method listed is relevant to your study. If you are not sure if a list item applies to your research, read the appropriate section before selecting a response.

### Materials & experimental systems

| n/a                                 | Involved in the study                                     |
|-------------------------------------|-----------------------------------------------------------|
| <input type="checkbox"/>            | <input checked="" type="checkbox"/> Antibodies            |
| <input type="checkbox"/>            | <input checked="" type="checkbox"/> Eukaryotic cell lines |
| <input checked="" type="checkbox"/> | <input type="checkbox"/> Palaeontology and archaeology    |
| <input checked="" type="checkbox"/> | <input type="checkbox"/> Animals and other organisms      |
| <input checked="" type="checkbox"/> | <input type="checkbox"/> Clinical data                    |
| <input checked="" type="checkbox"/> | <input type="checkbox"/> Dual use research of concern     |

### Methods

| n/a                                 | Involved in the study                              |
|-------------------------------------|----------------------------------------------------|
| <input checked="" type="checkbox"/> | <input type="checkbox"/> ChIP-seq                  |
| <input type="checkbox"/>            | <input checked="" type="checkbox"/> Flow cytometry |
| <input checked="" type="checkbox"/> | <input type="checkbox"/> MRI-based neuroimaging    |

## Antibodies

|                 |                                                                                                                                                                                                                                                                                                                                                                                     |
|-----------------|-------------------------------------------------------------------------------------------------------------------------------------------------------------------------------------------------------------------------------------------------------------------------------------------------------------------------------------------------------------------------------------|
| Antibodies used | The following antibodies were used for flow cytometry at 1:100 dilution: CD55-APC (Biolegend 311312), CD55-PE (Biolegend 311308), CD81-PE (Biolegend 349506), CD81-AlexaFluor700 (Biolegend 349518), B2M-APC (Biolegend 316311), KIT-PE (Biolegend 313204), KIT-BrilliantViolet785 (Biolegend 313238), FOLH1-APC (Biolegend 342508). The following antibodies were used for western |
|-----------------|-------------------------------------------------------------------------------------------------------------------------------------------------------------------------------------------------------------------------------------------------------------------------------------------------------------------------------------------------------------------------------------|

blotting: anti-HA-tag rabbit antibody (Cell Signaling Technology, cat# 3724S) at 1:1000 dilution and anti-GAPDH rabbit antibody (Cell Signaling Technology, cat# 2118) at 1:3000 dilution.

## Validation

Antibody specificity was directly validated by expression knockdown in CRISPRi experiments. Western blot antibodies were validated by migration of band at the expected size and/or the negative control samples that do not express the transgenic epitope targeted by the antibody (e.g. anti-HA).

## Eukaryotic cell lines

Policy information about [cell lines and Sex and Gender in Research](#)

## Cell line source(s)

K562 and HEK 293T cells were from ATCC. C42B cells are a gift from Leland Chung lab (the lab that originally derived the cell line). RN2 cell line was described previously (Zuber, J et al. Nature Biotechnology 29, 79-83, 2011) and was a gift from the laboratory of Christopher Vakoc (CSHL) to Junwei Shi's laboratory. B16-F10 cell line was obtained from ATCC (CRL-6475).

## Authentication

STR authentication was used to determine the identity of the parental cell lines used.

## Mycoplasma contamination

Mycoplasma screening was conducted on a routine basis and were always negative.

Commonly misidentified lines  
(See [ICLAC](#) register)

N/A

## Flow Cytometry

### Plots

Confirm that:

- The axis labels state the marker and fluorochrome used (e.g. CD4-FITC).
- The axis scales are clearly visible. Include numbers along axes only for bottom left plot of group (a 'group' is an analysis of identical markers).
- All plots are contour plots with outliers or pseudocolor plots.
- A numerical value for number of cells or percentage (with statistics) is provided.

### Methodology

## Sample preparation

K562 cell suspensions were transferred into 96-well plates. C42B and HEK 293T cells are harvested by trypsinization with 0.25% Trypsin-EDTA for 5min at 37deg. C and then neutralized with 2x volumes of media, then transferred into 96-well plates. Washes, antibody staining, and data acquisition were performed using PBS 1% BSA (including 1:100 dilution of antibody for staining step) as described in detail in the Methods section.

## Instrument

BD FACS Aria Fusion sorter. Attune NxT flow cytometer.

## Software

For analysis, .fcs files were exported and populations gated in FlowJo (10.8.2). Data exported as .csv files and plotted using custom R (version 4.1.0) scripts

## Cell population abundance

>5,000 cells were sorted for cell line engineering involving K562 cells. For C42B cell line engineering, >200 cells were sorted. Post-sort purity for sorting analyses were >90%, as determined by analyzing a small aliquot of a representative sorted sample to determine the fraction of cells that fall into the original sorting gate.

## Gating strategy

Single cells are gated based on FSC/SSC, followed by gating of specific fluorescent markers for crRNA constructs using the 99.9%tile of untransduced controls as threshold.

- Tick this box to confirm that a figure exemplifying the gating strategy is provided in the Supplementary Information.
